# Supplementary material for: Intraspecific Epitopic Variation in a Carbohydrate Antigen Exposed on the Surface of Trichostrongylus colubriformis Infective L3 Larvae
Source: PubMed Central journal article supplement (PMC2742895; doi:10.1371/journal.ppat.1000597), 2009-09-25

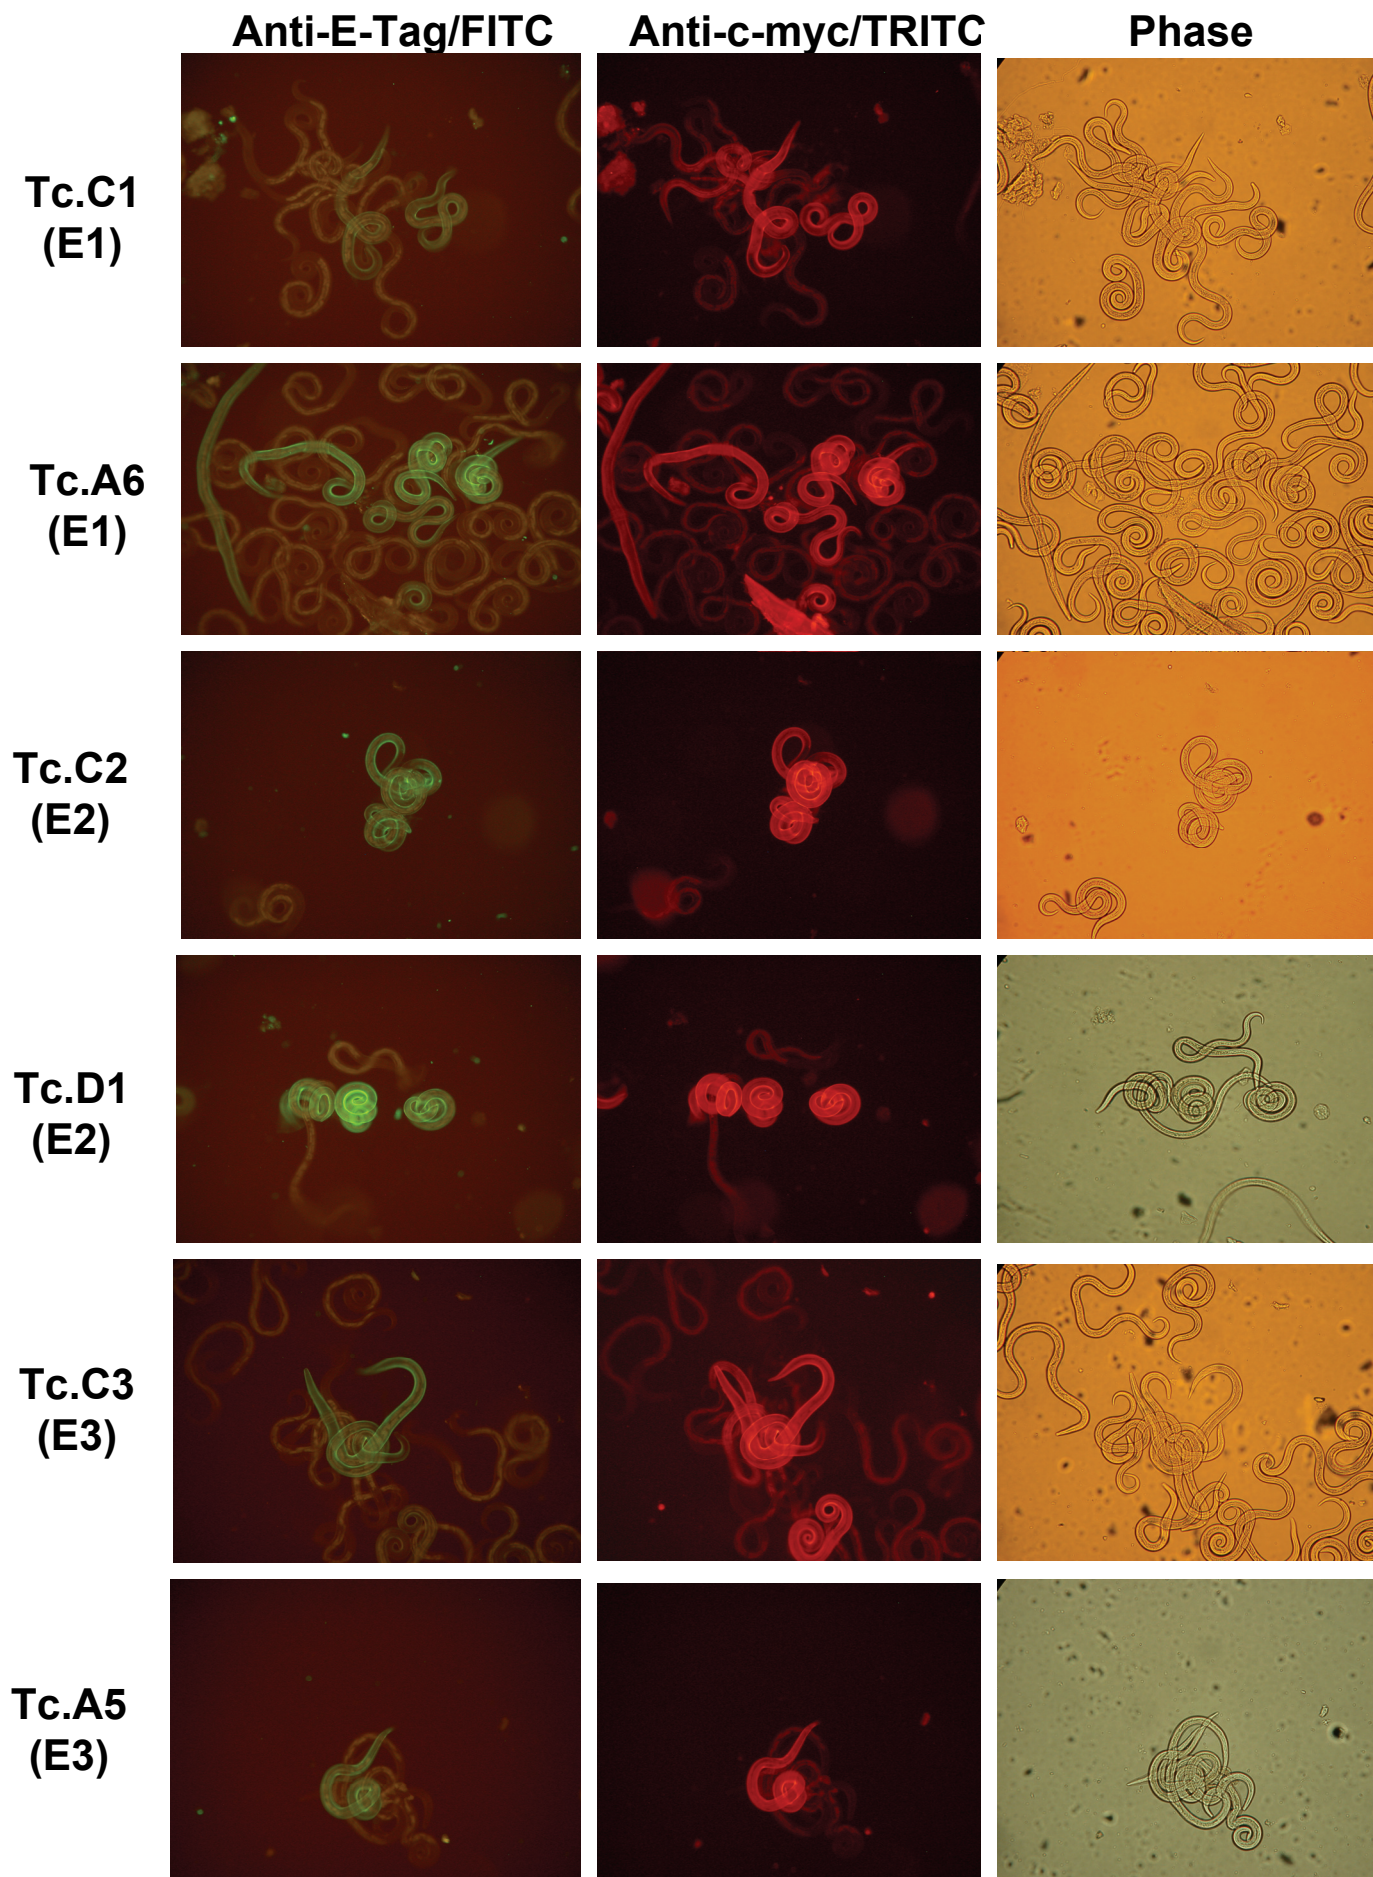

Supplement: ppat.1000597.s005.pdf [file ppat.1000597.s005.pdf]
